# Supplementary material for: Oligomeric state of the ZIKV E protein defines protective immune responses
Source: PubMed Central journal article supplement (PMC6787251; doi:10.1038/s41467-019-12677-6), 2019-10-10
Supplement: 41467_2019_12677_MOESM2_ESM.pdf [file 41467_2019_12677_MOESM2_ESM.pdf]

## Reporting Summary

Nature Research wishes to improve the reproducibility of the work that we publish. This form provides structure for consistency and transparency in reporting. For further information on Nature Research policies, see [Authors & Referees](#) and the [Editorial Policy Checklist](#).

### Statistics

For all statistical analyses, confirm that the following items are present in the figure legend, table legend, main text, or Methods section.

n/a Confirmed

- The exact sample size ( $n$ ) for each experimental group/condition, given as a discrete number and unit of measurement
- A statement on whether measurements were taken from distinct samples or whether the same sample was measured repeatedly
- The statistical test(s) used AND whether they are one- or two-sided  
*Only common tests should be described solely by name; describe more complex techniques in the Methods section.*
- A description of all covariates tested
- A description of any assumptions or corrections, such as tests of normality and adjustment for multiple comparisons
- A full description of the statistical parameters including central tendency (e.g. means) or other basic estimates (e.g. regression coefficient) AND variation (e.g. standard deviation) or associated estimates of uncertainty (e.g. confidence intervals)
- For null hypothesis testing, the test statistic (e.g.  $F$ ,  $t$ ,  $r$ ) with confidence intervals, effect sizes, degrees of freedom and  $P$  value noted  
*Give  $P$  values as exact values whenever suitable.*
- For Bayesian analysis, information on the choice of priors and Markov chain Monte Carlo settings
- For hierarchical and complex designs, identification of the appropriate level for tests and full reporting of outcomes
- Estimates of effect sizes (e.g. Cohen's  $d$ , Pearson's  $r$ ), indicating how they were calculated

*Our web collection on [statistics for biologists](#) contains articles on many of the points above.*

### Software and code

Policy information about [availability of computer code](#)

Data collection

n/a

Data analysis

Data was graphed and analyzed using GraphPad Prism software.

For manuscripts utilizing custom algorithms or software that are central to the research but not yet described in published literature, software must be made available to editors/reviewers. We strongly encourage code deposition in a community repository (e.g. GitHub). See the Nature Research [guidelines for submitting code & software](#) for further information.

### Data

Policy information about [availability of data](#)

All manuscripts must include a [data availability statement](#). This statement should provide the following information, where applicable:

- Accession codes, unique identifiers, or web links for publicly available datasets
- A list of figures that have associated raw data
- A description of any restrictions on data availability

All data generated or analyzed during this study are included in this published article.

### Field-specific reporting

Please select the one below that is the best fit for your research. If you are not sure, read the appropriate sections before making your selection.

- Life sciences       Behavioural & social sciences       Ecological, evolutionary & environmental sciences

For a reference copy of the document with all sections, see [nature.com/documents/nr-reporting-summary-flat.pdf](https://nature.com/documents/nr-reporting-summary-flat.pdf)

# Life sciences study design

All studies must disclose on these points even when the disclosure is negative.

|                 |                                                                                                                                                                          |
|-----------------|--------------------------------------------------------------------------------------------------------------------------------------------------------------------------|
| Sample size     | The sample size (n=5 per group) in the mouse immunogenicity studies has been chosen based on previously published studies where we analyzed DENV subunit immunogenicity. |
| Data exclusions | No data has been excluded                                                                                                                                                |
| Replication     | All samples have been analyzed in duplicate. Wildtype mouse immunizations has been replicated once in order to generate sufficient sera for passive transfer studies.    |
| Randomization   | mice were randomly attributed to experimental groups.                                                                                                                    |
| Blinding        | Authors were not blinded to group allocation in this study                                                                                                               |

## Reporting for specific materials, systems and methods

We require information from authors about some types of materials, experimental systems and methods used in many studies. Here, indicate whether each material, system or method listed is relevant to your study. If you are not sure if a list item applies to your research, read the appropriate section before selecting a response.

### Materials & experimental systems

### Methods

| n/a                                 | Involved in the study                                           |
|-------------------------------------|-----------------------------------------------------------------|
| <input type="checkbox"/>            | <input checked="" type="checkbox"/> Antibodies                  |
| <input type="checkbox"/>            | <input checked="" type="checkbox"/> Eukaryotic cell lines       |
| <input checked="" type="checkbox"/> | <input type="checkbox"/> Palaeontology                          |
| <input type="checkbox"/>            | <input checked="" type="checkbox"/> Animals and other organisms |
| <input checked="" type="checkbox"/> | <input type="checkbox"/> Human research participants            |
| <input checked="" type="checkbox"/> | <input type="checkbox"/> Clinical data                          |

| n/a                                 | Involved in the study                           |
|-------------------------------------|-------------------------------------------------|
| <input checked="" type="checkbox"/> | <input type="checkbox"/> ChIP-seq               |
| <input checked="" type="checkbox"/> | <input type="checkbox"/> Flow cytometry         |
| <input checked="" type="checkbox"/> | <input type="checkbox"/> MRI-based neuroimaging |

## Antibodies

|                 |                                                                                                                                                                                                                                                                                                                                                    |
|-----------------|----------------------------------------------------------------------------------------------------------------------------------------------------------------------------------------------------------------------------------------------------------------------------------------------------------------------------------------------------|
| Antibodies used | 4G2, 1M7, C8, C10, A9E, G9E, ZKA-230, 2D22, a-mouse IgG-AP, a-human IgG-AP                                                                                                                                                                                                                                                                         |
| Validation      | 4G2 --> Henchal et al., 1985; Am J Trop Med Hyg<br>1M7 --> Smith et al., 2014; J Vir<br>C8, C10 --> Rouvinsky et al., 2015; Nature<br>A9E, G9E --> Collins et al., 2019; JCI insight<br>ZKA-230 --> Stettler et al., 2016; Science<br>2D22 --> Firdriansah et al., 2015; Science<br>a-Mouse IgG-AP: Sigma (A9316)<br>a-human IgG-AP: Sigma (A1543) |

## Eukaryotic cell lines

Policy information about [cell lines](#)

|                                                                      |                                                       |
|----------------------------------------------------------------------|-------------------------------------------------------|
| Cell line source(s)                                                  | Vero-81 cell lines. Purchased from ATCC               |
| Authentication                                                       | Cell lines used were not authenticated after purchase |
| Mycoplasma contamination                                             | Cell lines used are mycoplasma free                   |
| Commonly misidentified lines<br>(See <a href="#">ICLAC</a> register) | n/a                                                   |

## Animals and other organisms

Policy information about [studies involving animals](#); [ARRIVE guidelines](#) recommended for reporting animal research

|                    |                                                                                                                                                                                     |
|--------------------|-------------------------------------------------------------------------------------------------------------------------------------------------------------------------------------|
| Laboratory animals | Female C57BL/6 mice were purchased from Jackson Laboratory .<br>Female A129 (B6.129S2-Ilnar1tm1Agt/Mmjax) mice were purchased from MMRRC (Mutant Mouse Resource & Research centers) |
|--------------------|-------------------------------------------------------------------------------------------------------------------------------------------------------------------------------------|

|                         |                                                                                                                                                                                                                                                                                                                                                      |
|-------------------------|------------------------------------------------------------------------------------------------------------------------------------------------------------------------------------------------------------------------------------------------------------------------------------------------------------------------------------------------------|
|                         | supported by NIH)                                                                                                                                                                                                                                                                                                                                    |
| Wild animals            | n/a                                                                                                                                                                                                                                                                                                                                                  |
| Field-collected samples | n/a                                                                                                                                                                                                                                                                                                                                                  |
| Ethics oversight        | All mouse experiments were performed under protocols approved by the University of North Carolina Institutional Animal Care and Use Committee, in compliance with federal regulations (the Public Health Service Policy on Humane Care and Use of Laboratory Animals, Animal Welfare Act, and the Guide for the Care and Use of Laboratory Animals). |

Note that full information on the approval of the study protocol must also be provided in the manuscript.
